# Supplementary material
Source: PubMed Central journal article supplement (PMC5338712)
Supplement: CJN.07460716SupplementaryData.pdf [file CJN.07460716SupplementaryData.pdf]

Supplemental Table 1. Medications used to identify HIV+ waitlist candidates.

|                                                         |
|---------------------------------------------------------|
| Abacavir Sulfate                                        |
| Abacavir Sulfate-Lamivudine                             |
| Abacavir Sulfate-Lamivudine-Zidovudine                  |
| Amprenavir                                              |
| Atazanavir Sulfate                                      |
| Darunavir Ethanolate                                    |
| Delavirdine Mesylate                                    |
| Didanosine                                              |
| Efavirenz                                               |
| Efavirenz-Emtricitabine-Tenofovir disoproxil fumarate   |
| Elvitegravir-Cobicistat-Emtricitabine-Tenofovir         |
| Emtricitabine-Rilpivirine-Tenofovir disoproxil fumarate |
| Enfuvirtide                                             |
| Etravirine                                              |
| Fosamprenavir calcium                                   |
| Indinavir sulfate                                       |
| Lamivudine-Zidovudine                                   |
| Lopinavir-Ritonavir                                     |
| Maraviroc                                               |
| Nelfinavir mesylate                                     |
| Nevirapine                                              |
| Raltegravir potassium                                   |
| Rilpivirine hcl                                         |
| Ritonavir                                               |

Supplemental Table 2. Characteristics of unique kidney-patient listings not in IMS vs. in IMS from January 1, 2001-October 2, 2012 based on a period of continuous fills

| Characteristic         | Not in IMS<br>% (N) | In IMS<br>% (N) |
|------------------------|---------------------|-----------------|
| Age category           |                     |                 |
| <18                    | 4.3 (8,860)         | 0               |
| 18-34                  | 14.4 (29,567)       | 8.3 (7,675)     |
| 35-49                  | 27.5 (56,327)       | 29.9 (27,577)   |
| 50-64                  | 39.9 (81,749)       | 45.4 (41,930)   |
| 65+                    | 13.8 (28,312)       | 16.4 (15,100)   |
| Race                   |                     |                 |
| Non-Hispanic White     | 44.6 (91,270)       | 52.3 (48,274)   |
| Black                  | 29.8 (60,962)       | 27.4 (25,263)   |
| Hispanic               | 17.7 (36,250)       | 13.3 (12,302)   |
| Asian/Pacific-Islander | 6.5 (13,218)        | 6.0 (5,552)     |
| Other                  | 1.5 (3,115)         | 1.0 (891)       |
| Male                   | 60.5 (123,904)      | 59.8 (55,174)   |
| Diagnosis              |                     |                 |
| Diabetes               | 28.5 (58,358)       | 32.1 (29,658)   |
| Hypertension           | 22.3 (45,768)       | 23.0 (21,195)   |
| Glomerulonephritis     | 19.3 (39,546)       | 17.4 (16,063)   |
| Other                  | 29.7 (60,821)       | 26.9 (24,832)   |
| Region                 |                     |                 |
| 1                      | 3.9 (8,089)         | 3.5 (3,242)     |
| 2                      | 12.5 (25,667)       | 15.6 (14,401)   |
| 3                      | 13.5 (27,556)       | 11.5 (10,586)   |
| 4                      | 10.2 (20,793)       | 7.4 (6,829)     |
| 5                      | 19.8 (40,630)       | 17.8 (16,391)   |
| 6                      | 2.5 (5,137)         | 3.8 (3,515)     |
| 7                      | 8.3 (17,084)        | 10.2 (9,426)    |
| 8                      | 5.1 (10,413)        | 5.2 (4,822)     |
| 9                      | 7.4 (15,177)        | 7.8 (7,185)     |
| 10                     | 7.4 (15,154)        | 8.8 (8,079)     |
| 11                     | 9.3 (19,115)        | 8.5 (7,806)     |
| Rural                  | 15.6 (32,019)       | 15.9 (14,678)   |
| Time on Dialysis       |                     |                 |
| None                   | 22.1 (45,221)       | 24.8 (22,871)   |
| <1 year                | 31.1 (63,723)       | 31.1 (28,738)   |
| 1-<2 years             | 17.7 (36,197)       | 16.9 (15,598)   |
| 2-<3 years             | 7.6 (15,622)        | 7.6 (7,009)     |
| 3-<4 years             | 4.2 (8,529)         | 4.1 (3,800)     |
| 4-<6 years             | 4.5 (9,310)         | 4.4 (4,102)     |
| 6-<11 years            | 5.8 (11,836)        | 5.2 (4,763)     |
| 11+ years              | 7.0 (14,377)        | 5.9 (5,401)     |

|                                                     |                |               |
|-----------------------------------------------------|----------------|---------------|
| Insurance                                           |                |               |
| Medicaid                                            | 8.8 (18,123)   | 7.3 (6,702)   |
| Medicare                                            | 45.0 (92,084)  | 45.0 (41,490) |
| Private                                             | 44.8 (91,706)  | 46.8 (43,212) |
| Other                                               | 1.4 (2,902)    | 1.0 (878)     |
| Blood Type                                          |                |               |
| A                                                   | 33.0 (67,677)  | 34.4 (31,748) |
| AB                                                  | 3.9 (7,973)    | 4.2 (3,836)   |
| B                                                   | 14.4 (29,526)  | 14.2 (13,141) |
| O                                                   | 48.6 (99,639)  | 47.2 (43,557) |
| Previous kidney transplant                          | 10.7 (21,877)  | 8.3 (7,695)   |
| Education level                                     |                |               |
| Grade school                                        | 8.3 (16,966)   | 6.2 (5,694)   |
| High school                                         | 39.8 (81,528)  | 40.0 (36,912) |
| Post-high school                                    | 17.4 (35,692)  | 20.1 (18,591) |
| Technical                                           | 20.3 (41,563)  | 21.3 (19,610) |
| Other                                               | 14.2 (29,066)  | 12.4 (11,475) |
| Angina or CAD                                       | 5.0 (10,304)   | 6.1 (5,654)   |
| Hypertension                                        | 71.9 (147,198) | 74.8 (69,063) |
| Cerebrovascular disease                             | 2.7 (5,480)    | 3.2 (2,914)   |
| Peripheral vascular disease                         | 4.5 (9,124)    | 5.0 (4,649)   |
| Malignancy                                          | 4.4 (9,048)    | 5.7 (5,231)   |
| Physical capacity                                   |                |               |
| Hospitalized                                        | 1.1 (2,293)    | 0.5 (472)     |
| Limited                                             | 4.7 (9,715)    | 5.7 (5,247)   |
| None                                                | 52.0 (106,413) | 56.8 (52,451) |
| Wheelchair                                          | 0.4 (773)      | 0.4 (347)     |
| Unknown                                             | 41.8 (85,621)  | 36.6 (33,765) |
| Medical condition                                   |                |               |
| Hospitalized                                        | 1.6 (3,253)    | 0.7 (663)     |
| Not Hospitalized                                    | 87.8 (179,885) | 87.8 (81,011) |
| Unknown                                             | 10.6 (21,677)  | 11.5 (10,608) |
| COPD                                                | 1.2 (2,406)    | 1.4 (1,285)   |
| Working for income                                  | 21.2 (43,438)  | 24.5 (22,571) |
| Diabetes                                            |                |               |
| Type I                                              | 5.9 (11,989)   | 6.9 (6,371)   |
| Type II                                             | 28.6 (58,557)  | 32.3 (29,792) |
| Type other/unknown                                  | 3.1 (6,298)    | 3.1 (2,858)   |
| None                                                | 60.6 (124,057) | 56.1 (51,809) |
| Unknown                                             | 1.9 (3,914)    | 1.6 (1,452)   |
| Number of previous nonrenal solid organ transplants |                |               |
| 0                                                   | 98.0 (200,785) | 98.3 (90,681) |
| 1                                                   | 1.9 (3,992)    | 1.7 (1,580)   |
| 2                                                   | 0.02 (38)      | 0.02 (20)     |
| 3                                                   | 0              | 0.001 (1)     |
